# Supplementary material
Source: HighWire-hosted journal article supplement (https://cmajopen.ca/highwire/filestream/81156/field_highwire_adjunct_files/0/2017-0051_COREQ_reporting_checklist.pdf)
Supplement: 2017-0051_COREQ_reporting_checklist.pdf [file 2017-0051_COREQ_reporting_checklist.pdf]

**Title:** Newspaper Portrayal of Family Veto in Organ Donation in Canada

**Authors:** Anthony SJ, Toews M, Caulfield T, & Wright L

**Table**

Consolidated criteria for reporting qualitative studies (COREQ): 32-item checklist

| No                                                     | Item                    | Guide questions/description                                 |                                                                                                                             |
|--------------------------------------------------------|-------------------------|-------------------------------------------------------------|-----------------------------------------------------------------------------------------------------------------------------|
| <b>Domain 1:<br/>Research team<br/>and reflexivity</b> |                         |                                                             |                                                                                                                             |
| Personal Characteristics                               |                         |                                                             |                                                                                                                             |
| 1.                                                     | Interviewer/facilitator | Which author/s conducted the interview or focus group?      | The first author (SA) conducted the media analysis. A second coder helped with the analysis. No interviews or focus groups. |
| 2.                                                     | Credentials             | What were the researcher's credentials? <i>E.g. PhD, MD</i> | PhD MSW                                                                                                                     |
| 3.                                                     | Occupation              | What was their occupation at the time of the study?         | Postdoctoral Trainee / Social Work Clinician                                                                                |

| No                             | Item                                     | Guide questions/description                                                                                        |                                          |
|--------------------------------|------------------------------------------|--------------------------------------------------------------------------------------------------------------------|------------------------------------------|
| 4.                             | Gender                                   | Was the researcher male or female?                                                                                 | Female                                   |
| 5.                             | Experience and training                  | What experience or training did the researcher have?                                                               | PhD, MSW<br>Qualitative methods training |
| Relationship with participants |                                          |                                                                                                                    |                                          |
| 6.                             | Relationship established                 | Was a relationship established prior to study commencement?                                                        | N/A                                      |
| 7.                             | Participant knowledge of the interviewer | What did the participants know about the researcher?<br><i>e.g. personal goals, reasons for doing the research</i> | N/A                                      |
| 8.                             | Interviewer characteristics              | What characteristics were reported about the interviewer/facilitator?<br><i>e.g. Bias, assumptions,</i>            | N/A                                      |

| No                            | Item                                  | Guide questions/description                                                                                                                                                                        |
|-------------------------------|---------------------------------------|----------------------------------------------------------------------------------------------------------------------------------------------------------------------------------------------------|
|                               |                                       | <i>reasons and interests in the research topic</i>                                                                                                                                                 |
| <b>Domain 2: study design</b> |                                       |                                                                                                                                                                                                    |
|                               | Theoretical framework                 |                                                                                                                                                                                                    |
| 9.                            | Methodological orientation and Theory | <p>What methodological orientation was stated to underpin the study? <i>e.g. grounded theory, discourse analysis, ethnography, phenomenology, content analysis</i></p> <p>Yes. Framing theory.</p> |
|                               | Participant selection                 |                                                                                                                                                                                                    |
| 10.                           | Sampling                              | <p>How were participants selected? <i>e.g. purposive, convenience, consecutive, snowball</i></p> <p>Database review guided by search strategy.</p>                                                 |

| No      | Item                         | Guide questions/description                                                        |                                |
|---------|------------------------------|------------------------------------------------------------------------------------|--------------------------------|
| 11.     | Method of approach           | How were participants approached? <i>e.g. face-to-face, telephone, mail, email</i> | N/A                            |
| 12.     | Sample size                  | How many participants were in the study?                                           | Final data set of 123 articles |
| 13.     | Non-participation            | How many people refused to participate or dropped out? Reasons?                    | N/A                            |
| Setting |                              |                                                                                    |                                |
| 14.     | Setting of data collection   | Where was the data collected? <i>e.g. home, clinic, workplace</i>                  | Newspaper articles             |
| 15.     | Presence of non-participants | Was anyone else present besides the participants and researchers?                  | N/A                            |
| 16.     | Description of sample        | What are the important characteristics of the sample? <i>e.g.</i>                  | N/A                            |

| No                            | Item                   | Guide questions/description                                                       |
|-------------------------------|------------------------|-----------------------------------------------------------------------------------|
| <i>demographic data, date</i> |                        |                                                                                   |
| Data collection               |                        |                                                                                   |
| 17.                           | Interview guide        | Were questions, prompts, guides provided by the authors? Was it pilot tested? N/A |
| 18.                           | Repeat interviews      | Were repeat interviews carried out? If yes, how many? N/A                         |
| 19.                           | Audio/visual recording | Did the research use audio or visual recording to collect the data? N/A           |
| 20.                           | Field notes            | Were field notes made during and/or after the interview or focus group? N/A       |
| 21.                           | Duration               | What was the duration of the interviews or N/A                                    |

| No                                      | Item                           | Guide questions/description                                              |                                                         |
|-----------------------------------------|--------------------------------|--------------------------------------------------------------------------|---------------------------------------------------------|
|                                         |                                | focus group?                                                             |                                                         |
| 22.                                     | Data saturation                | Was data saturation discussed?                                           | N/A                                                     |
| 23.                                     | Transcripts returned           | Were transcripts returned to participants for comment and/or correction? | N/A                                                     |
| <b>Domain 3: analysis and findingsz</b> |                                |                                                                          |                                                         |
| Data analysis                           |                                |                                                                          |                                                         |
| 24.                                     | Number of data coders          | How many data coders coded the data?                                     | Two                                                     |
| 25.                                     | Description of the coding tree | Did authors provide a description of the coding tree?                    | Yes                                                     |
| 26.                                     | Derivation of themes           | Were themes identified in advance or derived                             | An initial in-depth analysis of the data set identified |

| No        | Item                         | Guide questions/description                                                                                                                 |                                                                                                       |
|-----------|------------------------------|---------------------------------------------------------------------------------------------------------------------------------------------|-------------------------------------------------------------------------------------------------------|
|           |                              | from the data?                                                                                                                              | coding categories. All analytic categories were defined in a structured coding framework.             |
| 27.       | Software                     | What software, if applicable, was used to manage the data?                                                                                  | N/A                                                                                                   |
| 28.       | Participant checking         | Did participants provide feedback on the findings?                                                                                          | N/A                                                                                                   |
| Reporting |                              |                                                                                                                                             |                                                                                                       |
| 29.       | Quotations presented         | Were participant quotations presented to illustrate the themes / findings? Was each quotation identified?<br><i>e.g. participant number</i> | Yes. Quotes from articles were presented to support the themes/findings and referenced appropriately. |
| 30.       | Data and findings consistent | Was there consistency between the data presented and the findings?                                                                          | Yes.                                                                                                  |

| <b>No</b> | <b>Item</b>             | <b>Guide questions/description</b>                                         |
|-----------|-------------------------|----------------------------------------------------------------------------|
| 31.       | Clarity of major themes | Were major themes clearly presented in the findings? Yes                   |
| 32.       | Clarity of minor themes | Is there a description of diverse cases or discussion of minor themes? Yes |
